# Supplementary material for: An optimized workflow for improved gene expression profiling for formalin-fixed, paraffin-embedded tumor samples
Source: Springer Nature journal article supplement (doi:10.1186/2043-9113-3-10), 2013-01-01

**A**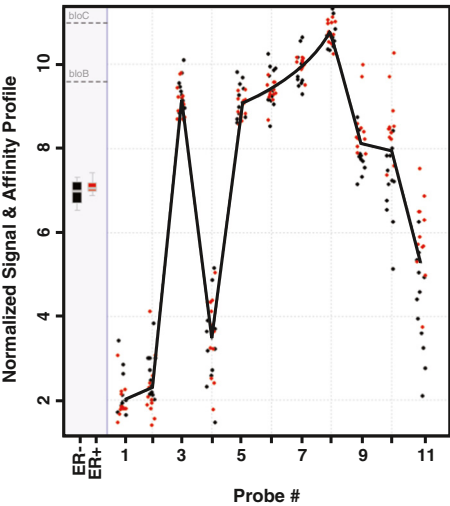**B**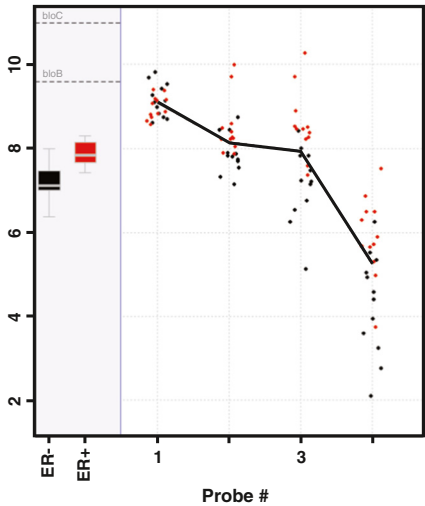

Supplement: 13336_2012_69_MOESM5_ESM.pdf [file 13336_2012_69_MOESM5_ESM.pdf]
