# Supplementary material for: An optimized workflow for improved gene expression profiling for formalin-fixed, paraffin-embedded tumor samples
Source: Springer Nature journal article supplement (doi:10.1186/2043-9113-3-10), 2013-01-01
Supplement: 13336_2012_69_MOESM7_ESM.pdf [file 13336_2012_69_MOESM7_ESM.pdf]

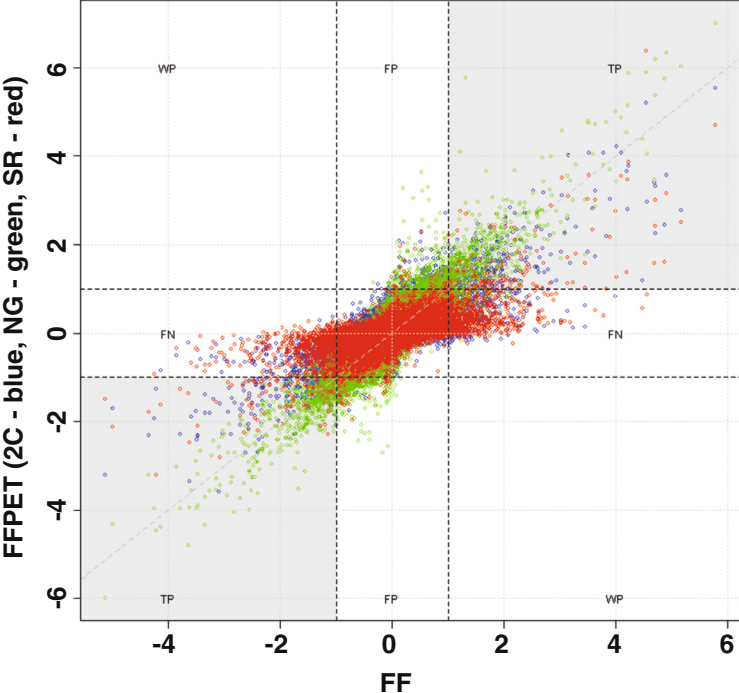

| Amplification kit      | TP     | FP    | TN      | FN     | WP  | Sensitivity | Specificity |
|------------------------|--------|-------|---------|--------|-----|-------------|-------------|
| Affymetrix             | 488.0  | 229.0 | 32796.0 | 1002.0 | 0.0 | 33%         | 99%         |
| NuGEN                  | 1187.0 | 961.0 | 32064.0 | 303.0  | 0.0 | 80%         | 97%         |
| Sigma/Rubicon Genomics | 218.0  | 82.0  | 32943.0 | 1272.0 | 0.0 | 15%         | 100%        |

FN, false negative; FP, false positive; TN, true negative; TP, true positive; WP wrong positive
